# Supplementary material for: CD39 is upregulated during activation of mouse and human T cells and attenuates the immune response to Listeria monocytogenes
Source: PubMed Central journal article supplement (PMC5942830; doi:10.1371/journal.pone.0197151), 2018-05-09
Supplement: pone.0197151.s001.pdf [file pone.0197151.s001.pdf]

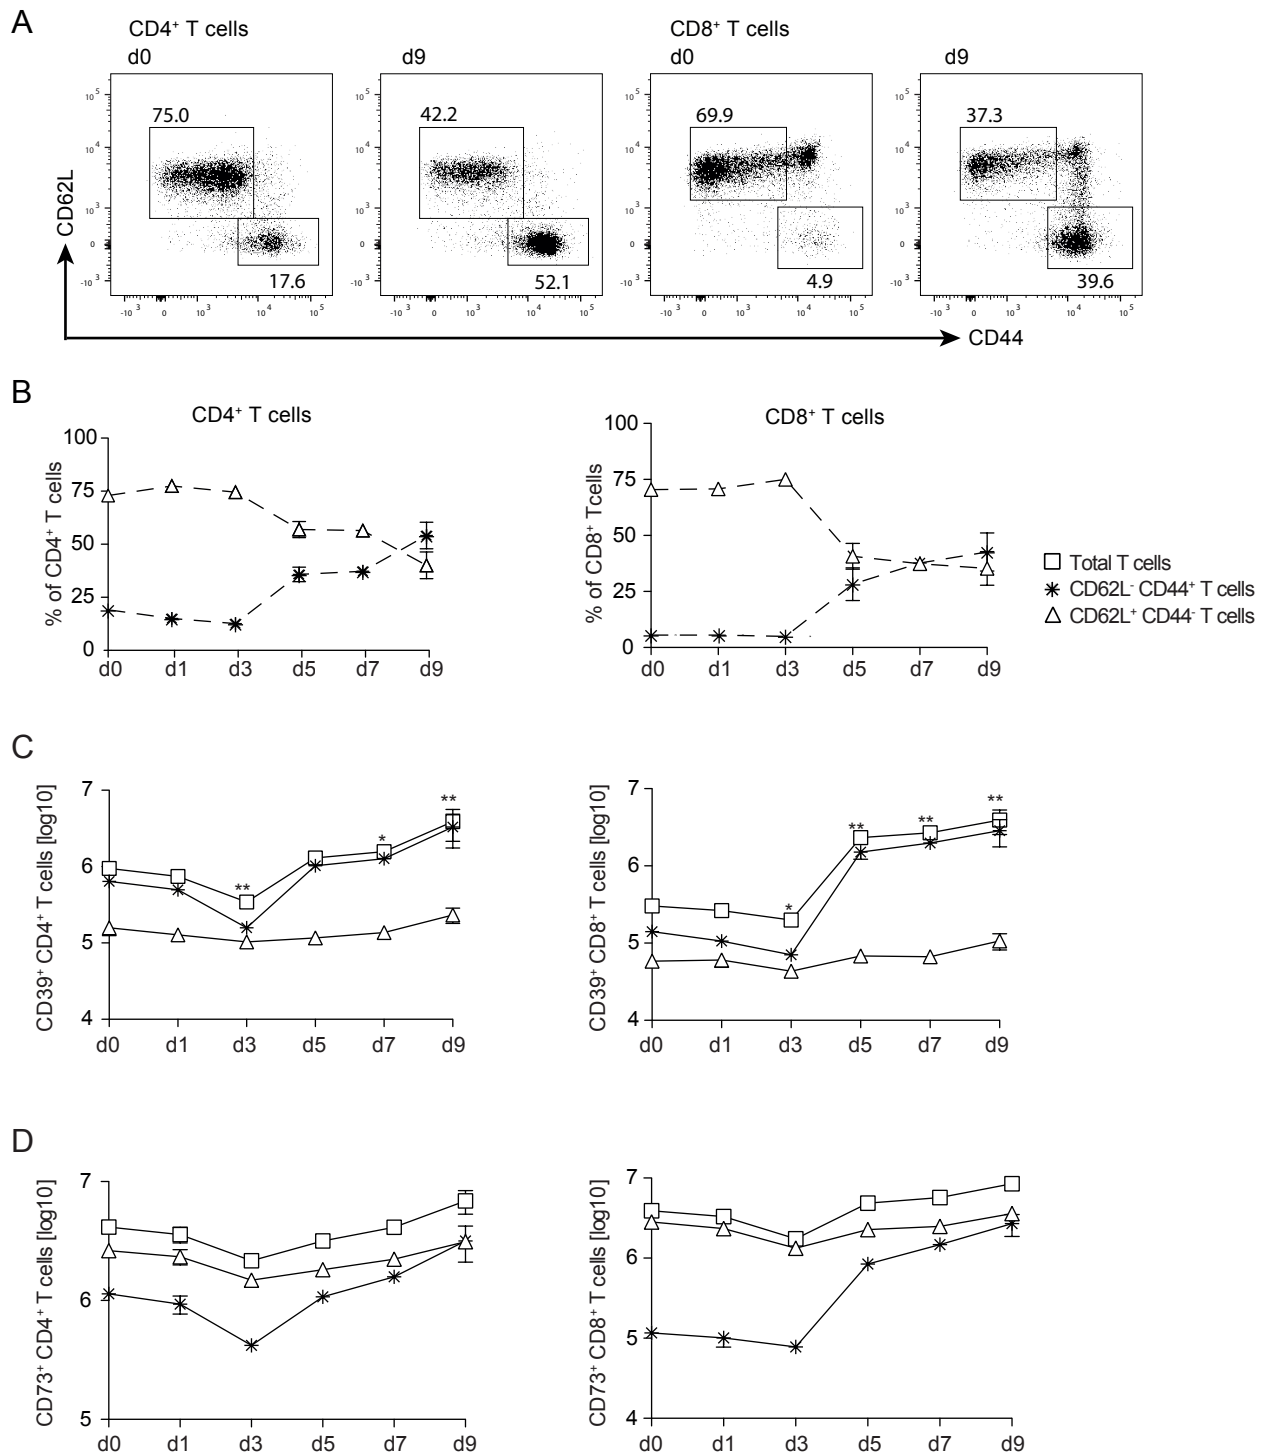

**S1 Fig: CD62L and CD44 expression profiles of T cells during the course of *L. monocytogenes* infection**

Wildtype mice were i.v. infected with  $1 \times 10^5$  LmOVA. At different time points post infection, spleen cells were analyzed by flow cytometry and changes in expression profile as well as percentages and numbers of different T-cell subsets were determined. (A) Representative dot plots for CD4 and CD8 gated cells. (B) Percentages of naive CD62L<sup>+</sup>CD44<sup>-</sup> and activated CD62L<sup>-</sup>CD44<sup>+</sup> CD4<sup>+</sup> and CD8<sup>+</sup> T cells. Values give the mean  $\pm$  SEM for 3 independently analyzed mice per time point and are representative for 3 independent experiments. (C, D) Numbers of total, CD62L<sup>+</sup>CD44<sup>-</sup>, and CD62L<sup>-</sup>CD44<sup>+</sup> cells for CD39<sup>+</sup> (C) and CD73<sup>+</sup> (D) CD4<sup>+</sup> and CD8<sup>+</sup> T cells. Values give the mean  $\pm$  SEM for 6 mice per group pooled from 2 independent experiments. Unpaired t test, comparison with day 0 (only shown for total T-cell populations), \*  $p < 0.05$ , \*\*  $p < 0.01$ .
