# Supplementary material for: CD39 is upregulated during activation of mouse and human T cells and attenuates the immune response to Listeria monocytogenes
Source: PubMed Central journal article supplement (PMC5942830; doi:10.1371/journal.pone.0197151), 2018-05-09
Supplement: pone.0197151.s003.pdf [file pone.0197151.s003.pdf]

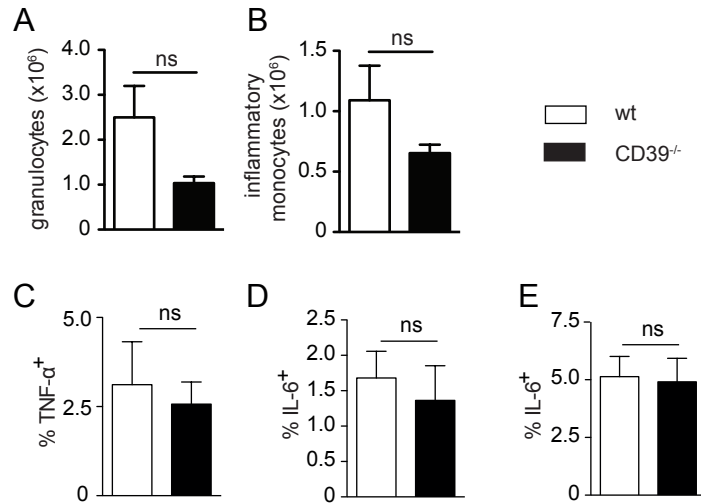

**S3 Fig: Accumulation of inflammatory cells in spleens of infected mice and production of TNF- $\alpha$  and IL-6 by wildtype and CD39<sup>-/-</sup> spleen cells**

Wildtype and CD39<sup>-/-</sup> mice were i.v. infected with  $5 \times 10^3$  Lm. On day 2 post infection, spleen cells were isolated and the numbers of neutrophil granulocytes (A) and inflammatory monocytes (B) were determined (for the gating strategy see S2A Fig). Bars represent the mean  $\pm$  SEM from 10 mice per group, pooled from two independent experiments. In both populations, the expression of IL-6 and TNF- $\alpha$  was directly analyzed by intracellular cytokine staining and flow cytometry. (C) Percentage of TNF- $\alpha^+$  neutrophils. (D) Percentage of IL-6<sup>+</sup> inflammatory monocytes. (E) Percentage of IL-6<sup>+</sup> neutrophils. Bars present the mean  $\pm$  SEM of five individually analyzed mice and are representative for two independent experiments with three or five mice per group. Unpaired t test, ns p>0.05.
